# Supplementary material
Source: publisher figshare collection journal article supplement (https://frontiersin.figshare.com/ndownloader/files/14486585)
Supplement: Supplementary file [file 14486585]

# Non-Halogenated Ionic Liquid Dramatically Enhances Tribological Performance of Biodegradable Oils

P. Rohlmann<sup>a,†</sup>, B. Munavirov<sup>a,b,†</sup>, I. Furó<sup>b</sup>, O. N. Antzutkin<sup>c</sup>, M. W. Rutland<sup>b,d,\*</sup> and S. Glavatskih<sup>a,e</sup>

<sup>a</sup>Machine Design, KTH Royal Institute of Technology, SE-100 44 Stockholm, Sweden

<sup>b</sup>Department of Chemistry, KTH Royal Institute of Technology, SE-100 44 Stockholm, Sweden

<sup>c</sup>Chemistry of Interfaces, Luleå University of Technology, SE-971 87 Luleå, Sweden

<sup>d</sup>SP Technical Research Institute of Sweden, SP Chemistry, Materials and Surfaces, SE-114 86 Stockholm, Sweden

<sup>e</sup>Department of Electrical Energy, Metals, Mechanical Constructions & Systems, Ghent University, Ghent, 9000, Belgium

\*Email: mark@kth.se

## Table of Content

|                                            |    |
|--------------------------------------------|----|
| 1. Viscosity Data                          | S1 |
| 2. Ball-on-three plates experimental setup | S2 |
| 3. Friction Data                           | S2 |
| 4. Wear scars                              | S3 |
| 5. Maximum Hertzian Contact Pressure       | S3 |

## 1. Viscosity data

**Table S1:** Properties of the tested lubricants at atmospheric pressure

| Fluid     | Fluid Dynamic Viscosity [mPa s] |           |
|-----------|---------------------------------|-----------|
|           | 40°C                            | 100°C     |
| ME        | 3.1 ± 0.1                       | 1.3 ± 0.2 |
| ME / IL   | 3.5 ± 0.1                       | 1.7 ± 0.2 |
| OPAG      | 43.0 ± 0.2                      | 7.7 ± 0.3 |
| OPAG / IL | 52.6 ± 0.2                      | 9.2 ± 0.1 |

<sup>†</sup> These authors have contributed equally to this work

## 2. Ball-on-three plates experimental setup

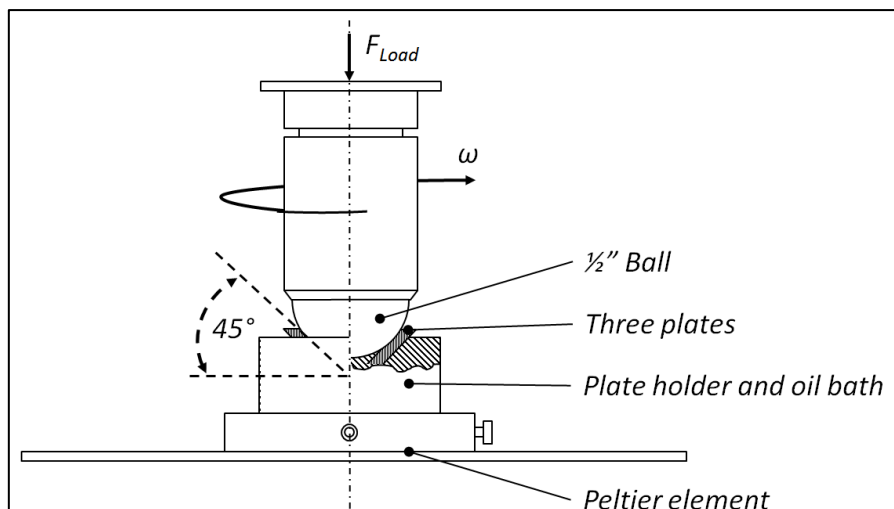

**Figure S1:** Ball-on-three-plates experimental setup

## 3. Friction data

Normal and friction forces were recorded with an acquisition frequency of 1 Hz. In the beginning of each test a running-in process resulted in a large variation of the coefficient of friction. The variation decreased with time in all cases but returned for the case ME + IL. The addition of IL to OPAG clearly reduced the friction compared to the neat oil.

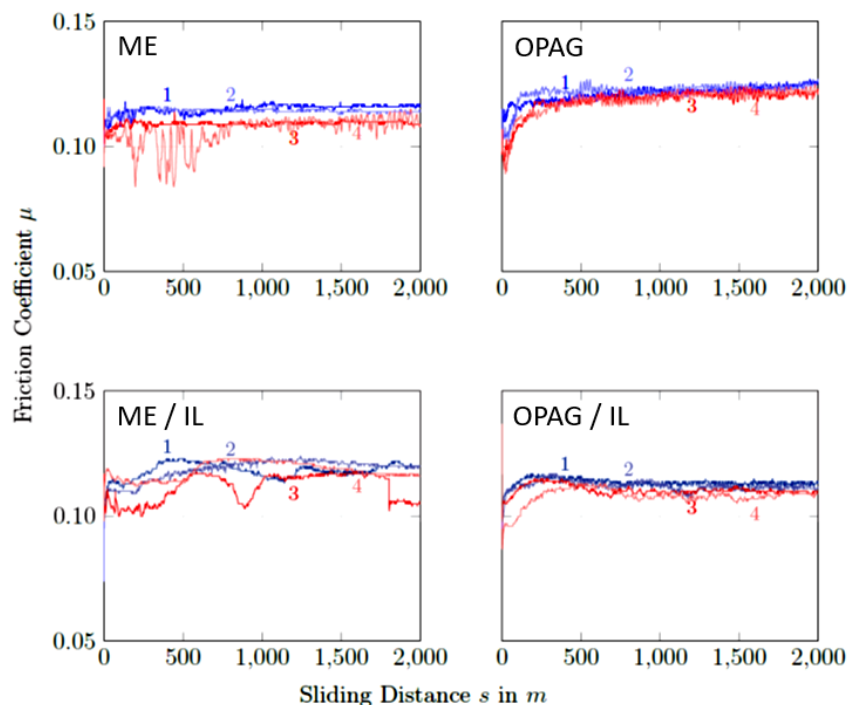

**Figure S2:** Coefficient of friction of oils and mixtures with IL at 90°C

#### 4. Wear scars

A contact between the ball and a plate should produce a wear scar of a circular shape. However, the elliptical shape of the wear scars is due to the 45° inclination of the plates (see **Figure S1**), thermal expansion of the setup during the experiments and tolerances. This effect is more visible for the smaller wear scars.

#### 5. Hertzian contact pressure

The maximum Hertzian contact pressure was calculated using Hertzian equation as below (Johnson, 1987):

$$P = 21.34 \text{ N}$$

Equivalent modulus of elasticity:

$$\frac{1}{E^*} = \frac{1-\nu_1^2}{E_1} + \frac{1-\nu_2^2}{E_2}, \quad (1)$$

$$\begin{aligned} \nu_1 &= \nu_2 = 0.3 \\ E_1 &= E_2 = 210 \text{ GPa} \end{aligned}$$

Equivalent radius:

$$\frac{1}{R} = \frac{1}{R_1} + \frac{1}{R_2}, \quad (2)$$

$$\begin{aligned} R_1 &= 6.35 \text{ mm} \\ R_2 &= \infty \end{aligned}$$

Maximum Hertzian contact pressure:

$$p_{max} = \sqrt[3]{\frac{6 P E^{*2}}{\pi^3 R^2}} = 1.11 \text{ GPa} \quad (3)$$
